# Supplementary material for: Hirsutella sinensis mycelium regulates autophagy of alveolar macrophages via TLR4/NF-κB signaling pathway
Source: PubMed Central journal article supplement (PMC7976595; doi:10.7150/ijms.51654), 2021-02-18
Supplement: ijmsv18p1810s1.pdf [file ijmsv18p1810s1.pdf]

### **Mitochondria Membrane Potential**

Mitochondrial membrane potential (MMP) in control and treated group of mice was determined by JC-1 (Fcmacs, Nanjing, China). In functional mitochondria, JC-1 spontaneously forms complexes known as J-aggregates that produce intense and discrete red fluorescence. In the mitochondria of abnormally functioning apoptotic or unhealthy cells, JC-1 remains in the monomeric form that emits bright green fluorescence [1, 2]. BALF was treated with JC-1 at 37 °C for 30 min, and unbound JC-1 was pipetted with PBS buffer. The fluorescence of JC-1 was detected by flow cytometry.

### **Immunofluorescence**

To assess HSM treatment mediated survival of macrophages that are present in lung tissues, we performed an apoptosis assay on mice lung tissue. The antibodies used for Immunofluorescence detection were F4/80 Polyclonal Antibody (Proteintech, Rosemont, IL, USA) and BCL2 Monoclonal antibody (Proteintech, Rosemont, IL, USA). The secondary antibodies used were FITC-goat anti-Rabbit IgG (H+L) and Cy3-AffiniPure goat Anti-Mouse IgG (H+L) (Jackson ImmunoResearch, Pennsylvania, USA). DAPI (Fcmacs, Nanjing, China) was used for nuclear counterstaining. Cells were imaged on a FV10i confocal microscope (OLYMPUS, Japan), and Image J was applied for data analysis.

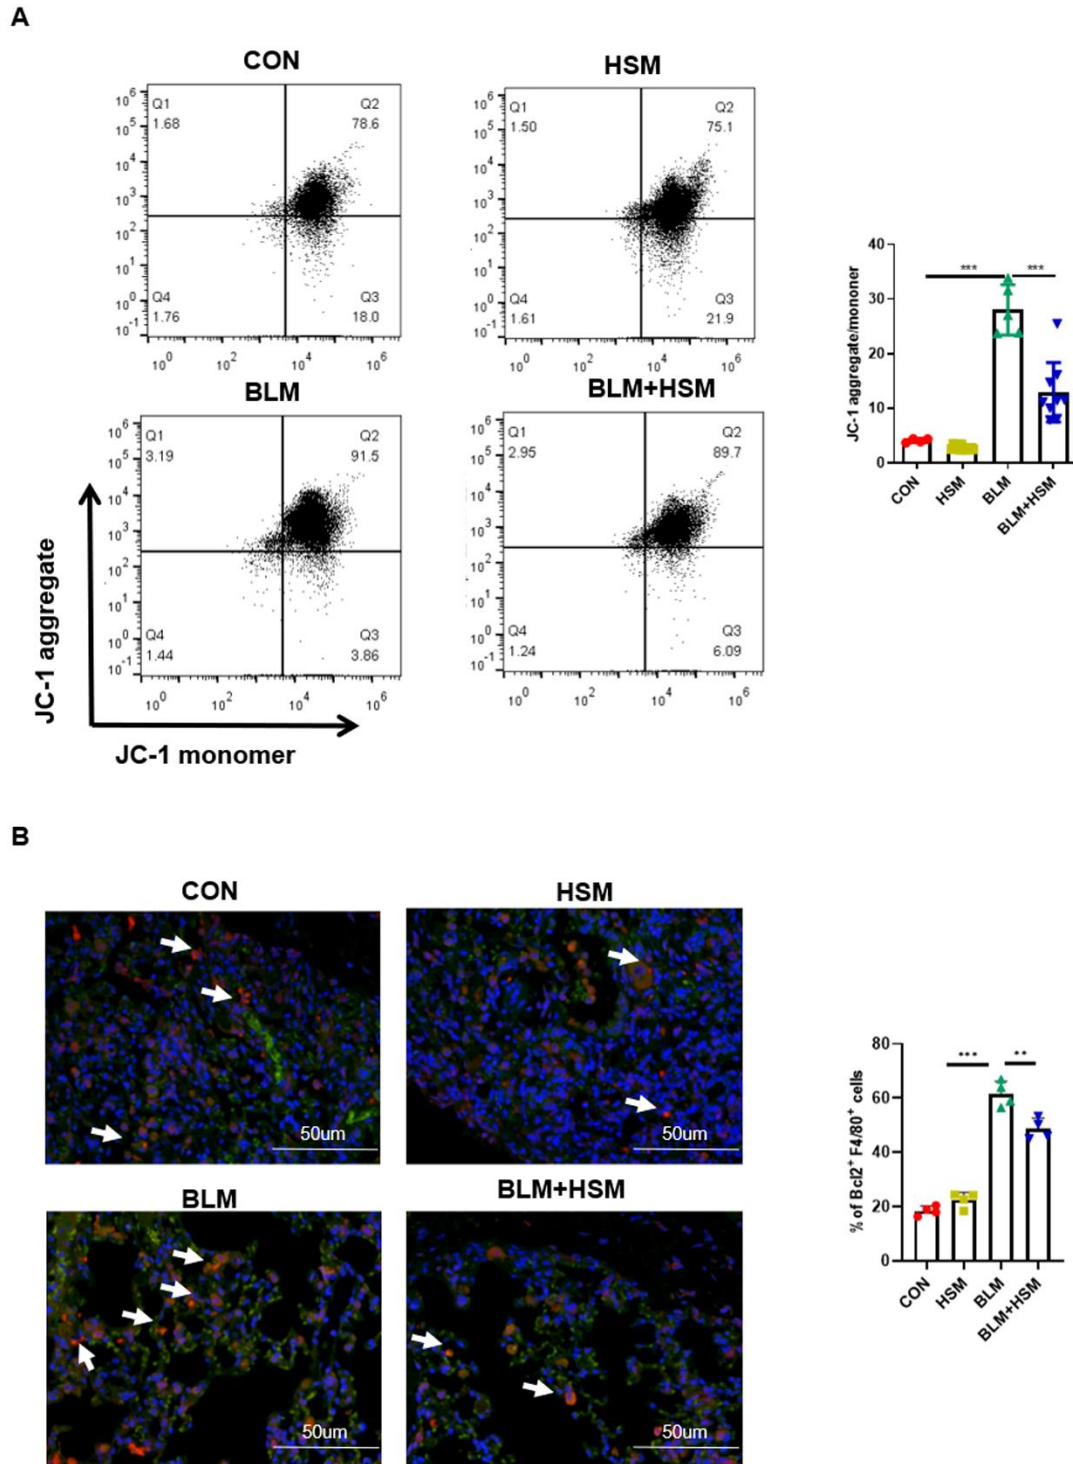

**Figure S1. Changed mitochondrial membrane potential and apoptosis by HSM in mice with pulmonary fibrosis (A).** Examining changes in mitochondrial membrane potential in BALF of pulmonary fibrosis mice, n=4. (B). Representative immunofluorescence image of F4/80 and Bcl2 double staining were presented. Cell death was measured by Bcl2 (red) staining, and macrophages

were identified by the macrophage surface marker, F4/80 (green), n=4. Scale bar: 50  $\mu$ m. Data are presented as means  $\pm$  SEM of at least three separate experiments. \*\* $P < 0.01$ , \*\*\* $P < 0.001$ .

## References

1. Smiley ST, Reers M, Mottola-Hartshorn C, et al. Intracellular heterogeneity in mitochondrial membrane potentials revealed by a J-aggregate-forming lipophilic cation JC-1. *Proc Natl Acad Sci U S A*. 1991; 88: 3671-5.
2. Akhtar MJ, Ahamed M, Alhadlaq HA, et al. Mitochondrial dysfunction, autophagy stimulation and non-apoptotic cell death caused by nitric oxide-inducing Pt-coated Au nanoparticle in human lung carcinoma cells. *Biochim Biophys Acta Gen Subj*. 2020; 1864: 129452.
